# Supplementary material for: Moderate-Intensity and High-Intensity Interval Exercise Training Offer Equal Cardioprotection, with Different Mechanisms, during the Development of Type 2 Diabetes in Rats
Source: MDPI journal article supplement (doi:10.3390/nu16030431), 2024-01-31
Supplement: s1 [file s1]

# Supplementary material

## 1. Supplementary table

**Table S1.** Primer sequences used for RT-qPCR.

| Gene          | Forward primer            | Reverse primer           |
|---------------|---------------------------|--------------------------|
| CD163         | ATCACAGCATGGCACAGGT       | TCCAGATCATCCGTCTTCG      |
| CD206         | AAGGTTCCGGTTTGTGGAG       | TGCATTGCCCAGTAAGGAG      |
| CD68          | CACTTGGCTCTCTCATTCCT      | GCTGAGAATGTCCACTGTGCT    |
| CD86          | GTCAAGACATGTGTAACCTGCACC  | ACGAGCTCACTCGGGCTTAT     |
| GLO1          | GAAGATGACGAGACGCAGAGTTAC  | CAGGATCTTGAACGAACGCCAGAC |
| HMBS          | TCCTGGCTTTACCATTTGGAG     | TGAATTCCAGGTGAGGGAAC     |
| IL-1 $\beta$  | ACCCAAGCACCTTCTTTTCCTT    | TGCAGCTGTCTAATGGGAACAT   |
| NOX4          | TCATGGATCTTTGCCTGGAGGGTT  | AGGTCTGTGGGAAATGAGCTTGGA |
| RAGE          | CAGGGTCACAGAAACCGG        | ATTCAGCTCTGCACGTTCTT     |
| RPL13A        | GGATCCCTCCACCCTATGACA     | CTGGTACTTCCACCCGACCTC    |
| SOD2          | AGCTGCACCACAGCAAGCAC      | TCCACCACCCTTAGGGCTCA     |
| TNF- $\alpha$ | CTTATCTACTCCCAGGTTCTCTCAA | GAGACTCCTCCCAGGTACATGG   |

Primer sequences are given in their 5'-3' orientation. CD163, Cluster of differentiation 163. CD206, Cluster of differentiation 206. CD68, Cluster of differentiation 68. CD86, Cluster of differentiation 86. GLO1, Glyoxalase 1. HMBS, Hydroxymethylbilane synthase. IL-1 $\beta$ , Interleukin 1 beta. NOX4, Nicotinamide adenine dinucleotide phosphate oxidase 4. RAGE, Receptor for advanced glycation end products. RPL13A, Ribosomal protein L13a. SOD2, Superoxide dismutase 2. TNF- $\alpha$ , Tumor necrosis factor alpha.

## 2. Supplementary figures

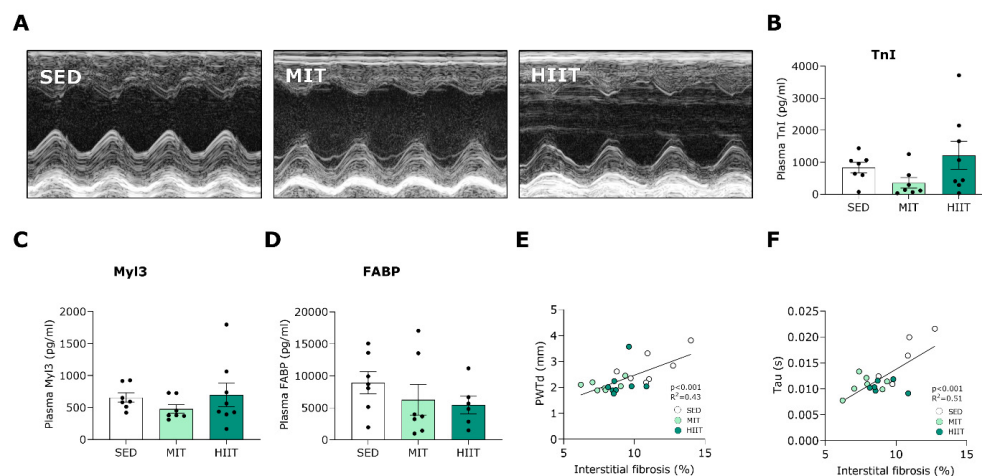

**Figure S1.** Representative LV echocardiographic images and quantification of cardiac injury biomarker protein levels. (A) Representative echocardiographic images obtained in M-mode, parasternal short-axis view. (B–D) Quantification of cardiac injury marker protein levels of (B) TnI, (C) Myl3 in plasma of SED (n=7), MIT (n=7) and HIIT (n=8) and, (D) FABP in plasma of SED (n=7), MIT (n=7) and HIIT (n=6). (E) Correlation between percentage of LV interstitial fibrosis and PWTd of SED (n=7), MIT (n=7) and HIIT (n=8). (F) Correlation between percentage of LV interstitial fibrosis and Tau of SED (n=5), MIT (n=7) and HIIT (n=6). Data represent mean  $\pm$  SEM. FABP, fatty acid binding protein. LV, left ventricular. Myl3, myosin light chain 3. PWTd, posterior wall thickness in diastole. Tau, time constant for isovolumetric relaxation. TnI, troponin I.

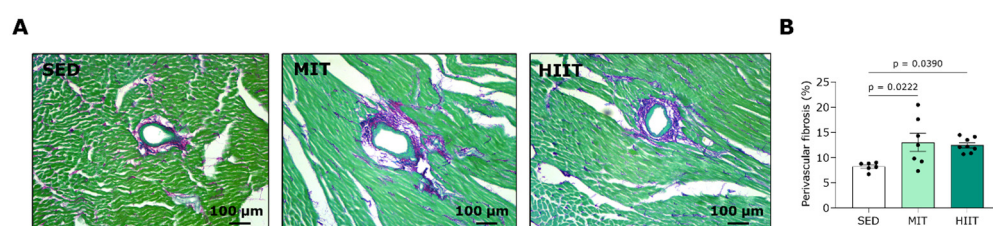

**Figure S1.** Perivascular fibrosis in LV tissue. (A) Representative pictures of LV tissue stained with Sirius Red/Fast Green, zoomed-in on cardiac blood vessels. Fibrotic tissue is stained purple while cardiac cells are stained green. (B) Quantification of the percentage of perivascular collagen deposition per surface area in LV tissue from SED (n=7), MIT (n=7) and HIIT (n=8).
